# Supplementary material
Source: Springer Nature journal article supplement (https://www.springermedizin.de/resource/supplementary/13058_2010_9487_MOESM13_ESM.pdf/9702268)

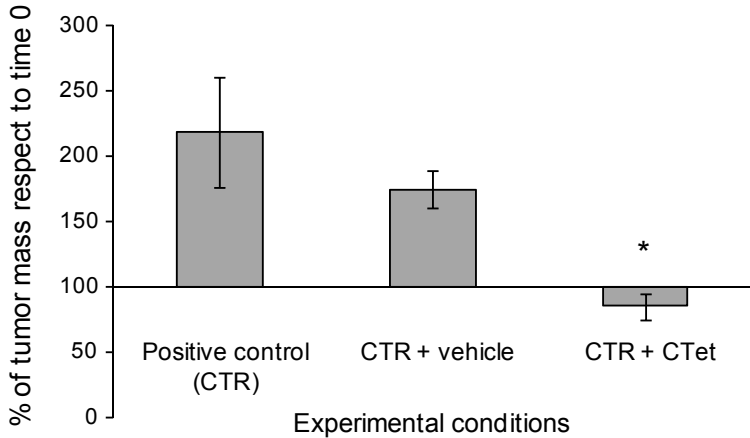

Supplement: MOESM13 [file 9702268]
